# Supplementary material for: Antiquorum and Antibiofilm Activities of Piper bogotense C. DC. against Pseudomonas aeruginosa and Identification of Bioactive Compounds
Source: MDPI journal article supplement (doi:10.3390/plants12091901), 2023-05-06
Supplement: s1 [file s1]

## Supplementary materials

### Table of content

1. Phytochemical study carried out on aerial part from *Piper bogotense*.

**Scheme S1.** Isolation scheme of compounds **1 a 3** from *Piper bogotense*.

2. Percentages of violacein production of *C. violaceum*, growth and biofilm formation of *P. aeruginosa* in the presence of extract and fractions of *P. bogotense*

**Table S1.** Percent of growth of *P. aeruginosa* on exposure to extract and fractions from *P. bogotense*.

**Table S2.** Percent of violacein production of *C. violaceum* on exposure to extract and fractions from *P. bogotense*.

**Table S3.** Percent of biofilm formation in *P. aeruginosa* on exposure to extract and fractions from *P. bogotense*.

3. NMR spectra data from compounds isolated from *Piper bogotense*.

**Figure S1.** <sup>1</sup>H-NMR spectra of 4-methoxy-3-farnesylbenzoic acid (**1**)

**Figure S2.** APT spectra of 4-methoxy-3-farnesylbenzoic acid (**1**)

**Figure S3.** <sup>1</sup>H-NMR spectra of 4-hydroxy-3-farnesylbenzoic acid (**2**)

**Figure S4.** APT spectra of 4-hydroxy-3-farnesylbenzoic acid (**2**)

**Figure S5.** <sup>1</sup>H-NMR spectra of 2-farnesylhydroquinone (**3**)

**Figure S6.** APT spectra of 2-farnesylhydroquinone (**3**)

4. Percentages of violacein production of *C. violaceum*, growth, biofilm formation and production of virulence factors of *P. aeruginosa* in the presence of *P. bogotense* compounds

**Table S4.** Percent of growth of *P. aeruginosa* on exposure to compounds from *P. bogotense*.

**Table S5.** Effect of compounds of *P. bogotense* against *C. violaceum* quorum sensing and biofilm formation and production of virulence factors of *P. aeruginosa*

1. Isolation compounds

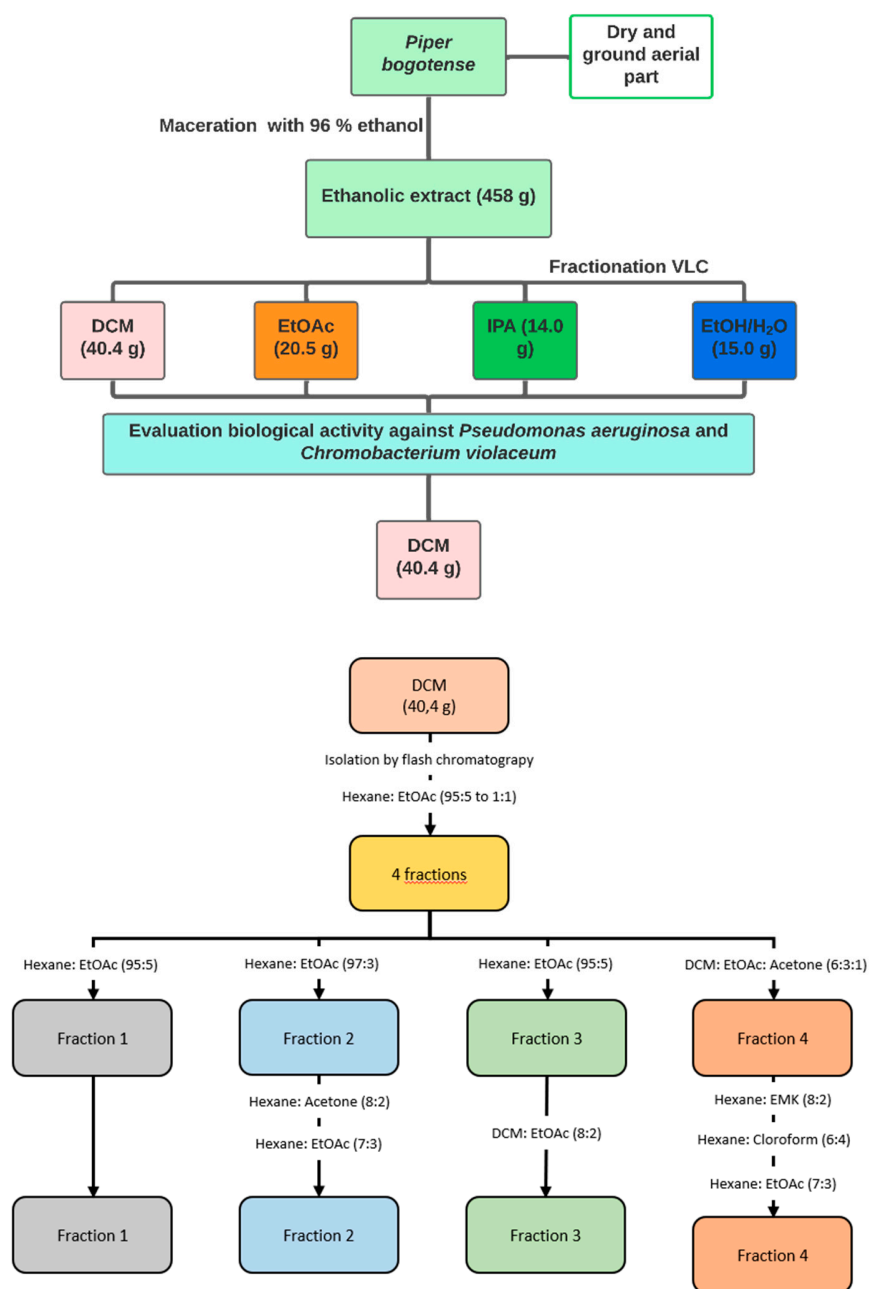

**Scheme S1.** Isolation scheme of compounds 1 a 3 from *Piper bogotense*.

**Table S1.** Percent of growth of *P. aeruginosa* on exposure to extract and fractions from *P. bogotense*.

| Treatment | Concentrations µg/mL |
|-----------|----------------------|
|-----------|----------------------|

|                       | 1000        | 500         | 250         |
|-----------------------|-------------|-------------|-------------|
| Extract               | 101.9 ± 1.0 | 98.8 ± 2.5  | 95.6 ± 2.1  |
| DCM                   | 107.5 ± 5.4 | 96.3 ± 2.3  | 95.1 ± 0.3  |
| EtOAc                 | 102.3 ± 4.2 | 108.7 ± 5.1 | 110.8 ± 4.7 |
| IPA                   | 106.8 ± 3.1 | 107.6 ± 2.1 | 104.3 ± 2.9 |
| EtOH:H <sub>2</sub> O | 129.5 ± 2.8 | 123.6 ± 2.9 | 118.6 ± 4.9 |
| Gentamicine 2 µg/mL   | 100 ± 0.8   |             |             |

**Table S2.** Percent of violacein production of *C. violaceum* on exposure to extract and fractions from *P. bogotense*.

| Treatment             | Concentrations µg/mL |             |             |
|-----------------------|----------------------|-------------|-------------|
|                       | 1000                 | 250         | 62.5        |
| Extract               | 4.2 ± 1.1*           | 38.7 ± 2.7* | 77.9 ± 4.3* |
| DCM                   | 35.1 ± 6.1*          | 35.5 ± 2.8* | 73.3 ± 6.1* |
| EtOAc                 | 46.1 ± 9.9*          | 64.9 ± 7.5* | 85.9 ± 7.2  |
| IPA                   | 33.3 ± 7.8*          | 0.6 ± 0.5*  | 0.9 ± 0.7*  |
| EtOH:H <sub>2</sub> O | 0.7 ± 0.6*           | 83.8 ± 9.2  | 90.4 ± 7.5  |
| Thymol                | 15 ± 0.5             |             |             |

Data are represented the mean ± standard deviation of five independent replicates. \*Indicate a significant difference according to Duncan's test ( $p < 0.05$ ).

**Table S3.** Percentage of biofilm formation in *P. aeruginosa* on exposure to extract and fractions from *P. bogotense*.

| Treatment             | Concentrations µg/mL |              |             |
|-----------------------|----------------------|--------------|-------------|
|                       | 1000                 | 250          | 62.5        |
| Extract               | 71.5 ± 14.2*         | 33.1 ± 0.8*  | 19.8 ± 1.4* |
| DCM                   | 44.5 ± 15.6*         | 18.9 ± 11.1* | 88.1 ± 9.3  |
| EtOAc                 | 95.7 ± 3.6           | 76.8 ± 9.1*  | 73.1 ± 8.1* |
| IPA                   | 105.9 ± 9.9          | 94.1 ± 3.9   | 101.5 ± 5.9 |
| EtOH:H <sub>2</sub> O | 107.1 ± 8.1          | 98.1 ± 2.6   | 93.3 ± 5.5  |
| Quercetin 3.9 µg/mL   | 13.7 ± 3.9           |              |             |

Data are represented the mean ± standard deviation of five independent replicates. \*Indicate a significant difference according to Duncan's test ( $p < 0.05$ ).

## 2. NMR spectra from phytochemistry isolation

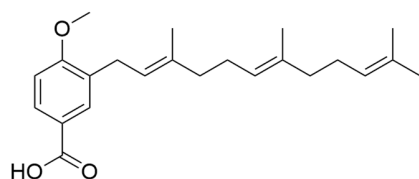

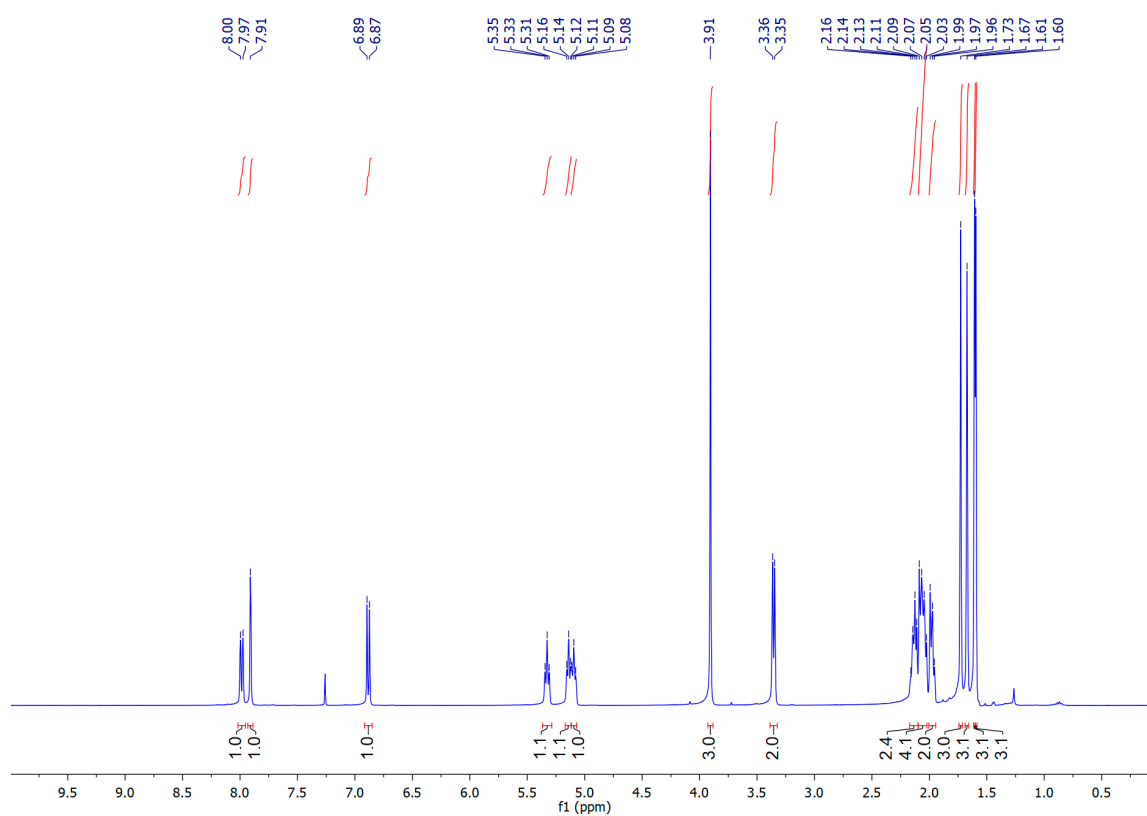

**Figure S1.** <sup>1</sup>H-NMR spectra of 3-farnesyl-4-methoxybenzoic acid (**1**)

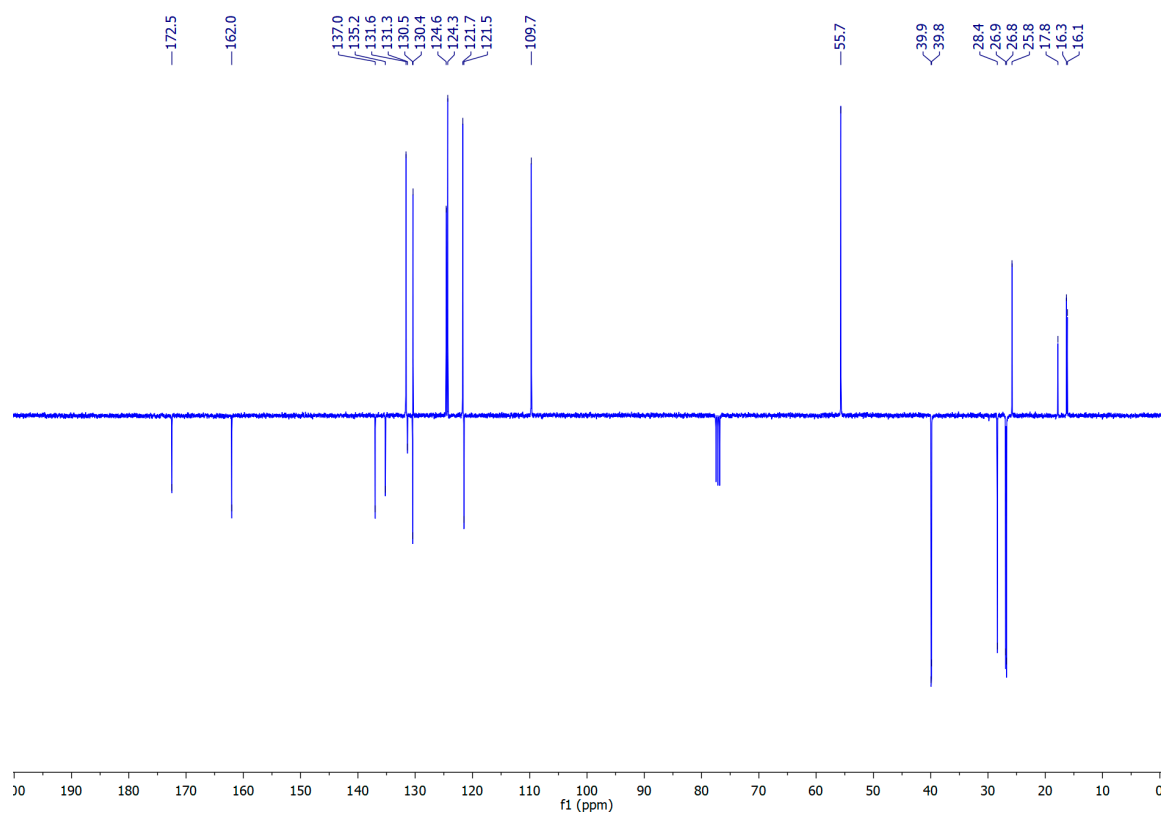

**Figure S2.** APT spectra of 3-farnesyl-4-methoxybenzoic acid (1)

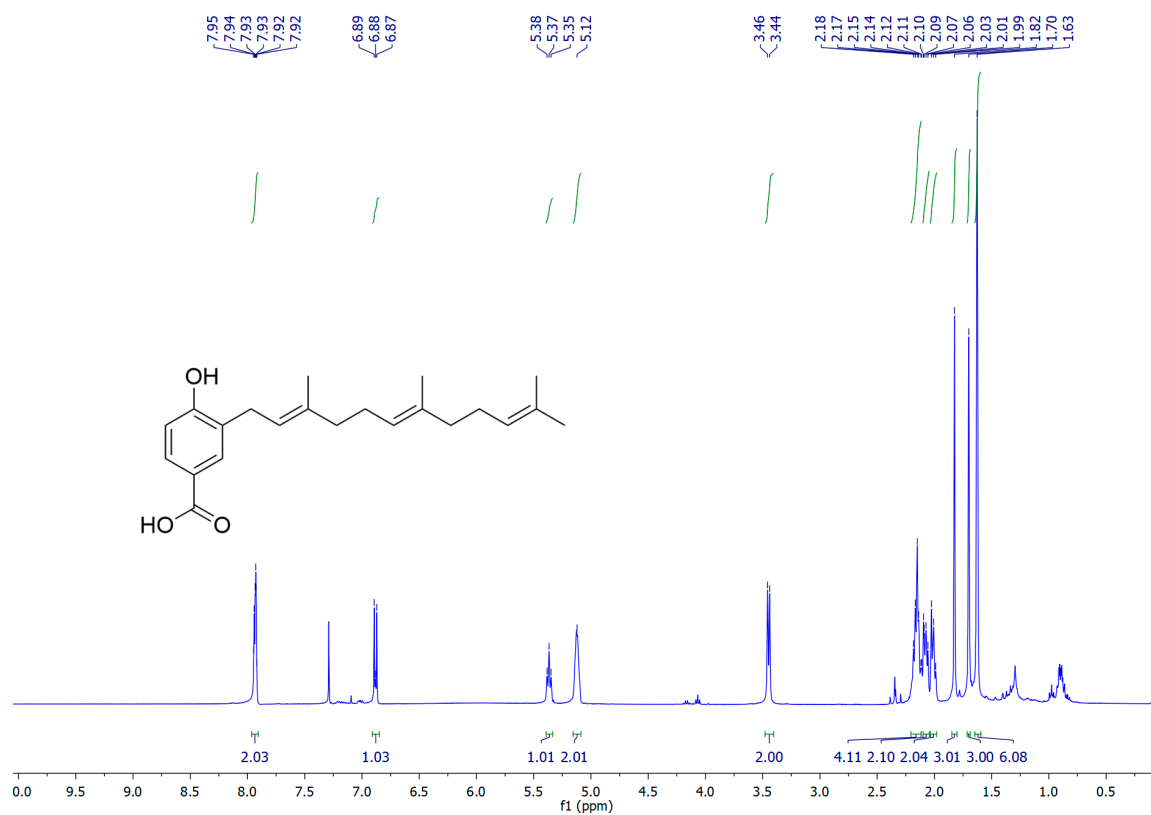

**Figure S3.** <sup>1</sup>H-NMR spectra of 3-farnesyl-4-hydroxybenzoic acid (2)

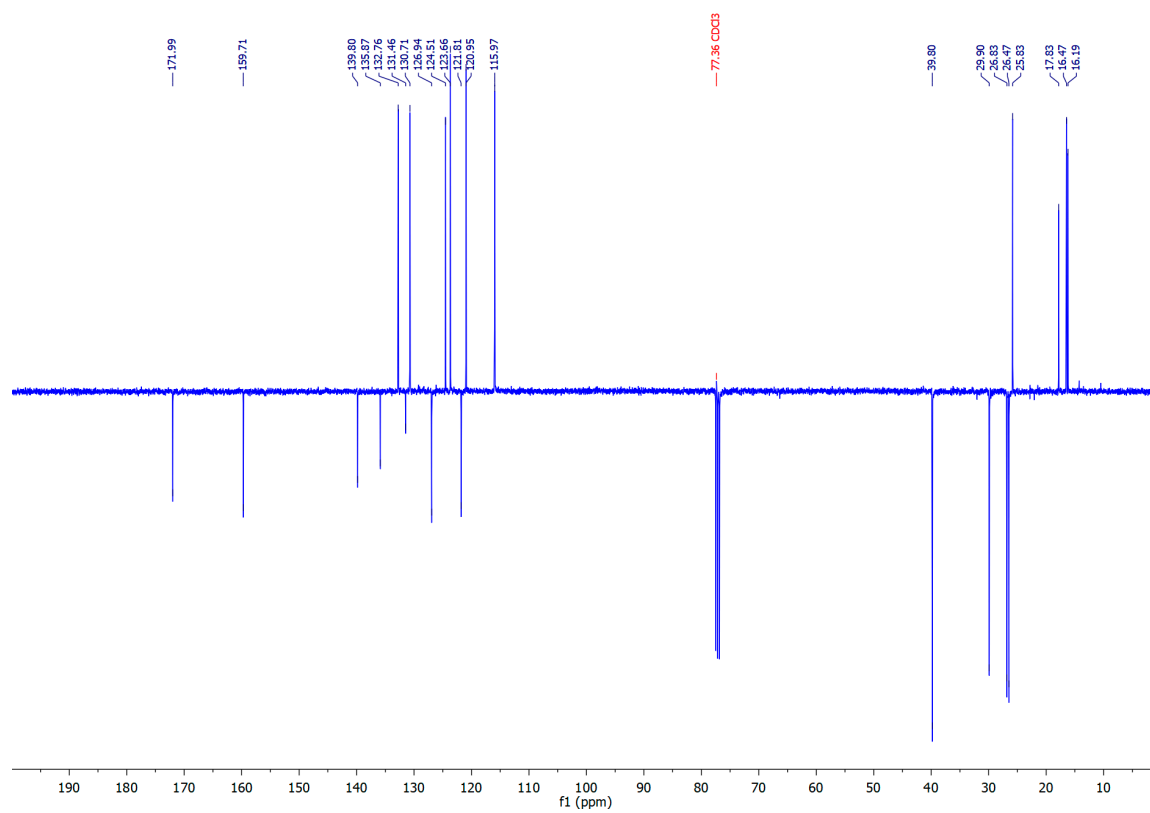

**Figure S4.** APT spectra of 3-farnesyl-4-hydroxybenzoic acid (**2**)

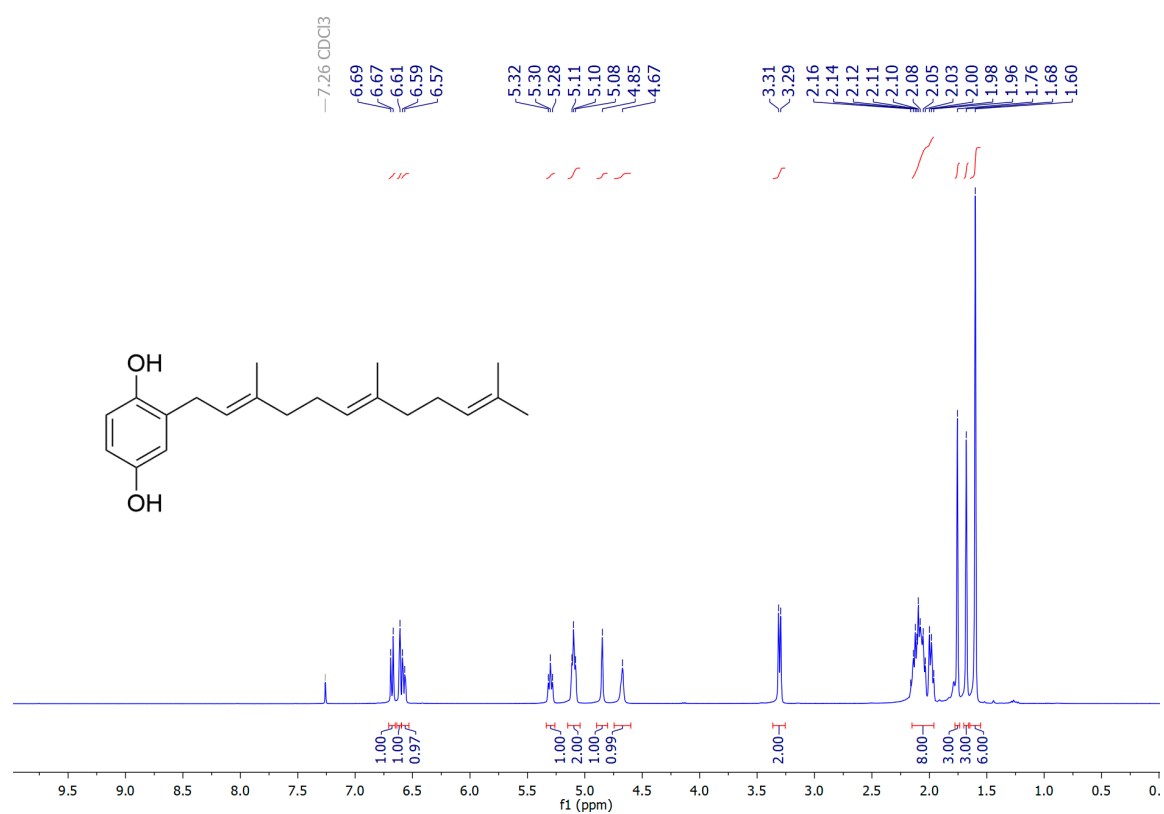

**Figure S5.** <sup>1</sup>H-NMR spectra of 2-farnesylhydroquinone (3)



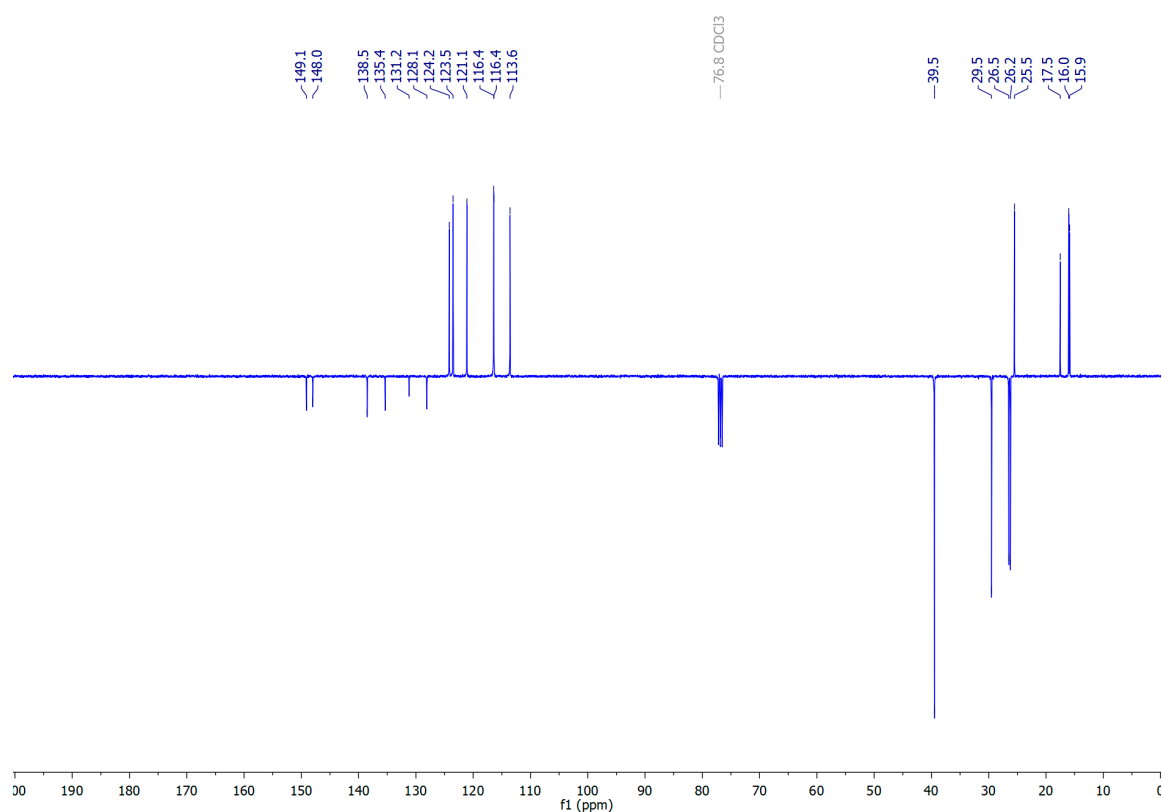

**Figure S6.** APT spectra of 2-farnesylhydroquinone (**3**)

**Table S4.** Percent of growth of *P. aeruginosa* on exposure to compounds from *P. bogotense*.

| Compound           | Concentrations $\mu\text{g/mL}$ |                 |                 |
|--------------------|---------------------------------|-----------------|-----------------|
|                    | 250                             | 125             | 62.5            |
| <b>1</b>           | 108.3 $\pm$ 4.1                 | 104.5 $\pm$ 4.8 | 114.7 $\pm$ 8.9 |
| <b>2</b>           | 112.9 $\pm$ 4.0                 | 102.3 $\pm$ 2.0 | 108.3 $\pm$ 4.9 |
| <b>3</b>           | 97.4 $\pm$ 2.3                  | 101.5 $\pm$ 1.3 | 102.7 $\pm$ 2.2 |
| <b>Gentamicine</b> | 5.2 $\pm$ 0.8                   |                 |                 |

**Table S5.** Effect of compounds of *P. bogotense* against *C. violaceum* quorum sensing and biofilm formation and production of virulence factors of *P. aeruginosa*.

| Compound | Bioassay   | Concentrations µg/mL |               |               |
|----------|------------|----------------------|---------------|---------------|
|          |            | 250                  | 125           | 62.5          |
| 1        | Violacein  | 75.4 ± 3.8           | 75.9 ± 3.5    | 89.5 ± 3.5    |
|          | Biofilm    | 207.5 ± 10.3*        | 155.1 ± 18.8* | 112.5 ± 28.6  |
|          | Piocianina | 78.3 ± 17.2          | 81.7 ± 2.3    | 81.4 ± 15.3   |
|          | Proteasas  | 91.1 ± 1.1           | 92.7 ± 4.4    | 93.3 ± 2.1    |
|          | Elastasas  | 87.8 ± 22.3          | 99.0 ± 13.3   | 95.4 ± 18.2   |
| 2        | Violacein  | 43.8 ± 9.1           | 49.7 ± 4.4    | 83.8 ± 4.8    |
|          | Biofilm    | 82.3 ± 29.9          | 178.3 ± 24.2* | 157.1 ± 13.4* |
|          | Piocianina | 54.0 ± 20.0*         | 58.8 ± 18.7*  | 39.7 ± 7.8*   |
|          | Proteasas  | 80.6 ± 16.4          | 79.6 ± 19.2   | 87.8 ± 16.3   |
|          | Elastasas  | 60.2 ± 16.4*         | 88.1 ± 13.5   | 101.6 ± 17.5  |
| 3        | Violacein  | 68.3 ± 6.1           | 70.2 ± 10.1   | 79.1 ± 16.1   |
|          | Biofilm    | 142.8 ± 20.8*        | 115.8 ± 4.2   | 73.3 ± 11.0   |
|          | Piocianina | 33.2 ± 20.0*         | 69.6 ± 21.3   | 78.9 ± 2.5    |
|          | Proteasas  | 73.9 ± 13.9*         | 84.3 ± 11.0   | 101.2 ± 4.3   |
|          | Elastasas  | 51.4 ± 18.3*         | 100.8 ± 20.8  | 93.9 ± 22.4   |

Data are represented the mean ± standard deviation of five independent replicates. \*Indicate a significant difference according to Duncan's test ( $p < 0.05$ ).
